# Supplementary material for: Survival and associated factors of mortality of preterm neonates admitted to Felege Hiwot specialized hospital, Bahir Dar, Ethiopia
Source: PubMed Central journal article supplement — SAGE Open Med. 2020 Aug 29;8:2050312120953646. doi: 10.1177/2050312120953646 (PMC7457651; doi:10.1177/2050312120953646), 2020-08-29
Supplement: Questionnaire.pdf [file Questionnaire.pdf]

DATA ABSTRACTION SHEET

1) Identification: Age at admission (hours or days)\_\_\_\_\_ Sex of neonate\_\_\_\_\_

2) Gestational age (from LNMP or by Ballard score) \_\_\_\_\_

3) Birthweight (gram)\_\_\_\_\_ Weight for gestational age\_\_\_\_\_ Admission Temperature (0c) \_\_\_\_\_

4) Apgar score; 1<sup>st</sup> minute\_\_\_\_\_5<sup>th</sup> minute\_\_\_\_\_10<sup>th</sup> minute\_\_\_\_\_

5) Place of birth: FHS  District hospital  Health center  Home

6) Type of pregnancy a) Singleton  b) Twin  c) Triplet

7) Maternal age \_\_\_\_\_ address \_\_\_\_\_ parity \_\_\_\_\_

8) Maternal medical problems

Preeclampsia/Eclampsia  DM (Type1, 2 or gestational)  Chronic hypertension

9) ANC a) yes  b) NO

10) Antenatal steroid a) given  b) Not given

11) Preterm PROM a) Yes  b) No

12) Mode of delivery: SVD  C/S  Forceps  Vacuum

13) Main neonatal medical problem: RDS  Sepsis  Hypoglycemia  Meningitis  IVH   
Anemia  Hyperbilirubinemia  other (specify) \_\_\_\_\_

14) Treatment i) Antibiotics used during hospital stay a) Ampicillin  b) Gentamycin  c) ceftriaxone   
d) vancomycine  e) ceftazidim  f) ciprofloxacin  g) Metronidazole

ii) If antibiotics given, duration of all antibiotics (in days) \_\_\_\_\_

iii) Feeding during hospital stay a) Trophic feeding  b) full calorie feeding from the beginning  c) maintenance fluid only

15) Outcome of preterm neonate: Discharged improved  Died  Went against medical advice/ disappeared

16) Age at; discharge \_\_\_\_\_ death \_\_\_\_\_ Went against medical advice/ disappeared \_\_\_\_\_

17) Cause of death: RDS  NEC  Uncontrolled sepsis  Apnea of prematurity   
Uncontrolled HAI  pulmonary hemorrhage  other(specify) \_\_\_\_\_
